# Supplementary material for: Molecular Profile of Barrett’s Esophagus and Gastroesophageal Reflux Disease in the Development of Translational Physiological and Pharmacological Studies
Source: PubMed Central journal article supplement (PMC7504401; doi:10.3390/ijms21176436), 2020-09-03
Supplement: ijms-21-06436-s001.pdf [file ijms-21-06436-s001.pdf]

**Table S1.** The list of selected human genes (and reference genes) and the corresponding TaqMan assays.

| No. | Gene name and symbol                                   | Assay ID      | NCBI gene reference |
|-----|--------------------------------------------------------|---------------|---------------------|
| 1   | $\beta$ -actin, <i>ACTB</i>                            | Hs99999903_m1 | NM_001101.3         |
| 2   | Glyceraldehyde-3-phosphate dehydrogenase, <i>GAPDH</i> | Hs99999905_m1 | NM_002046.5         |
| 3   | Keratin 1, <i>KRT1</i>                                 | Hs00196158_m1 | NM_006121.3         |
| 4   | Keratin 4, <i>KRT4</i>                                 | Hs00361611_m1 | NM_002272.3         |
| 5   | Keratin 5, <i>KRT5</i>                                 | Hs00361185_m1 | NM_000424.3         |
| 6   | Keratin 6A, <i>KRT6A</i>                               | Hs01699178_g1 | NM_005554.3         |
| 7   | Keratin 7, <i>KRT7</i>                                 | Hs00559840_m1 | NM_005556.3         |
| 8   | Keratin 8, <i>KRT8</i>                                 | Hs01670053_m1 | NM_001256282.1      |
| 9   | Keratin 13, <i>KRT13</i>                               | Hs00999762_m1 | NM_153490.2         |
| 10  | Keratin 14, <i>KRT14</i>                               | Hs00265033_m1 | NM_000526.4         |
| 11  | Keratin 15, <i>KRT15</i>                               | Hs00267035_m1 | NM_002275.3         |
| 12  | Keratin 16, <i>KRT16</i>                               | Hs00373910_g1 | NM_005557.3         |
| 13  | Keratin 18, <i>KRT18</i>                               | Hs02827483_g1 | NM_000224.2         |
| 14  | Keratin 20, <i>KRT20</i>                               | Hs00300643_m1 | NM_019010.2         |
| 15  | Keratin 23, <i>KRT23</i>                               | Hs01119992_m1 | NM_015515.4         |
| 16  | Keratin 24, <i>KRT24</i>                               | Hs00962561_m1 | NM_019016.2         |
| 17  | Mucin 2, oligomeric mucus/gel-forming, <i>MUC2</i>     | Hs00159374_m1 | NM_002457.3         |
| 18  | Mucin 3A/B, cell surface associated, <i>MUC3A/B</i>    | Hs03649367_mH | NM_005960.1         |
| 19  | Mucin 6, oligomeric mucus/gel-forming, <i>MUC6</i>     | Hs01674026_g1 | NM_005961.2         |
| 20  | Mucin 5B, oligomeric mucus/gel-forming, <i>MUC5B</i>   | Hs00861588_m1 | NM_002458.2         |
| 21  | Mucin 13, cell surface associated, <i>MUC13</i>        | Hs00217230_m1 | NM_033049.3         |
| 22  | Trefoil factor 1, <i>TFF1</i>                          | Hs00170216_m1 | NM_003225.2         |
| 23  | Trefoil factor 2, <i>TFF2</i>                          | Hs00193719_m1 | NM_005423.4         |
| 24  | Trefoil factor 3, <i>TFF3</i>                          | Hs00173625_m1 | NM_003226.3         |
| 25  | Villin 1, <i>VIL1</i>                                  | Hs00200229_m1 | NM_007127.2         |

**Table S2.** The list of selected rat genes (and reference genes) and the corresponding TaqMan assays.

| No. | Gene name and symbol                                   | Assay ID      | NCBI gene reference |
|-----|--------------------------------------------------------|---------------|---------------------|
| 1   | $\beta$ -actin, <i>ACTB</i>                            | Rn00667869_m1 | NM_031144           |
| 2   | Glyceraldehyde-3-phosphate dehydrogenase, <i>GAPDH</i> | Rn01462662_g1 | NM_017008           |
| 3   | Keratin 1, <i>KRT1</i>                                 | Rn02346048_m1 | NM_001008802        |
| 4   | Keratin 4, <i>KRT4</i>                                 | Rn02346072_m1 | NM_001008806        |
| 5   | Keratin 5, <i>KRT5</i>                                 | Rn01533116_gH | NM_183333           |
| 6   | Keratin 6, <i>KRT6</i>                                 | not available |                     |
| 7   | Keratin 7, <i>KRT7</i>                                 | Rn01533141_m1 | XM_003750407        |
| 8   | Keratin 8, <i>KRT8</i>                                 | Rn01532759_g1 | NM_199370           |
| 9   | Keratin 13, <i>KRT13</i>                               | Rn01464231_m1 | NM_001004021        |
| 10  | Keratin 14, <i>KRT14</i>                               | Rn01467684_m1 | NM_001008751        |
| 11  | Keratin 15, <i>KRT15</i>                               | Rn01460389_m1 | NM_001004022        |
| 12  | Keratin 16, <i>KRT16</i>                               | Rn02345941_g1 | NM_001008752        |

|    |                                                      |               |              |
|----|------------------------------------------------------|---------------|--------------|
| 13 | Keratin 18, <i>KRT18</i>                             | Rn01533362_g1 | NM_053976    |
| 14 | Keratin 20, <i>KRT20</i>                             | Rn00687576_m1 | NM_173128    |
| 15 | Keratin 23, <i>KRT23</i>                             | Rn01773106_m1 | NM_001008753 |
| 16 | Keratin 24, <i>KRT24</i>                             | Rn01471287_m1 | NM_001004131 |
| 17 | Mucin 2, oligomeric mucus/gel-forming, <i>MUC2</i>   | Rn01498197_m1 | XM_008760048 |
| 18 | Mucin 3A, intestinal, <i>MUC3a</i>                   | Rn01481134_m1 | XM_008769185 |
| 19 | Mucin 5B, oligomeric mucus/gel-forming, <i>MUC5B</i> | Rn01502008_m1 | XM_006230608 |
| 20 | Mucin 6, oligomeric mucus/gel-forming, <i>MUC6</i>   | Rn01759814_m1 | XM_008760036 |
| 21 | Mucin 13, cell surface associated, <i>MUC13</i>      | Rn01647776_g1 | XM_008768788 |
| 22 | Trefoil factor 1, <i>TFF1</i>                        | Rn01428805_m1 | NM_057129    |
| 23 | Trefoil factor 2, <i>TFF2</i>                        | Rn00587721_m1 | NM_053844    |
| 24 | Trefoil factor 3, <i>TFF3</i>                        | Rn00564851_m1 | NM_013042    |
| 25 | Villin 1, <i>VIL1</i>                                | Rn01400773_g1 | NM_001108224 |
